# Supplementary material for: Deciphering the Genetic Inheritance of Tocopherols in Indian Mustard (Brassica juncea L. Czern and Coss)
Source: MDPI journal article supplement (doi:10.3390/plants11131779), 2022-07-05

Supplementary Figure S1: HPLC chromatogram for Tocopherol standards

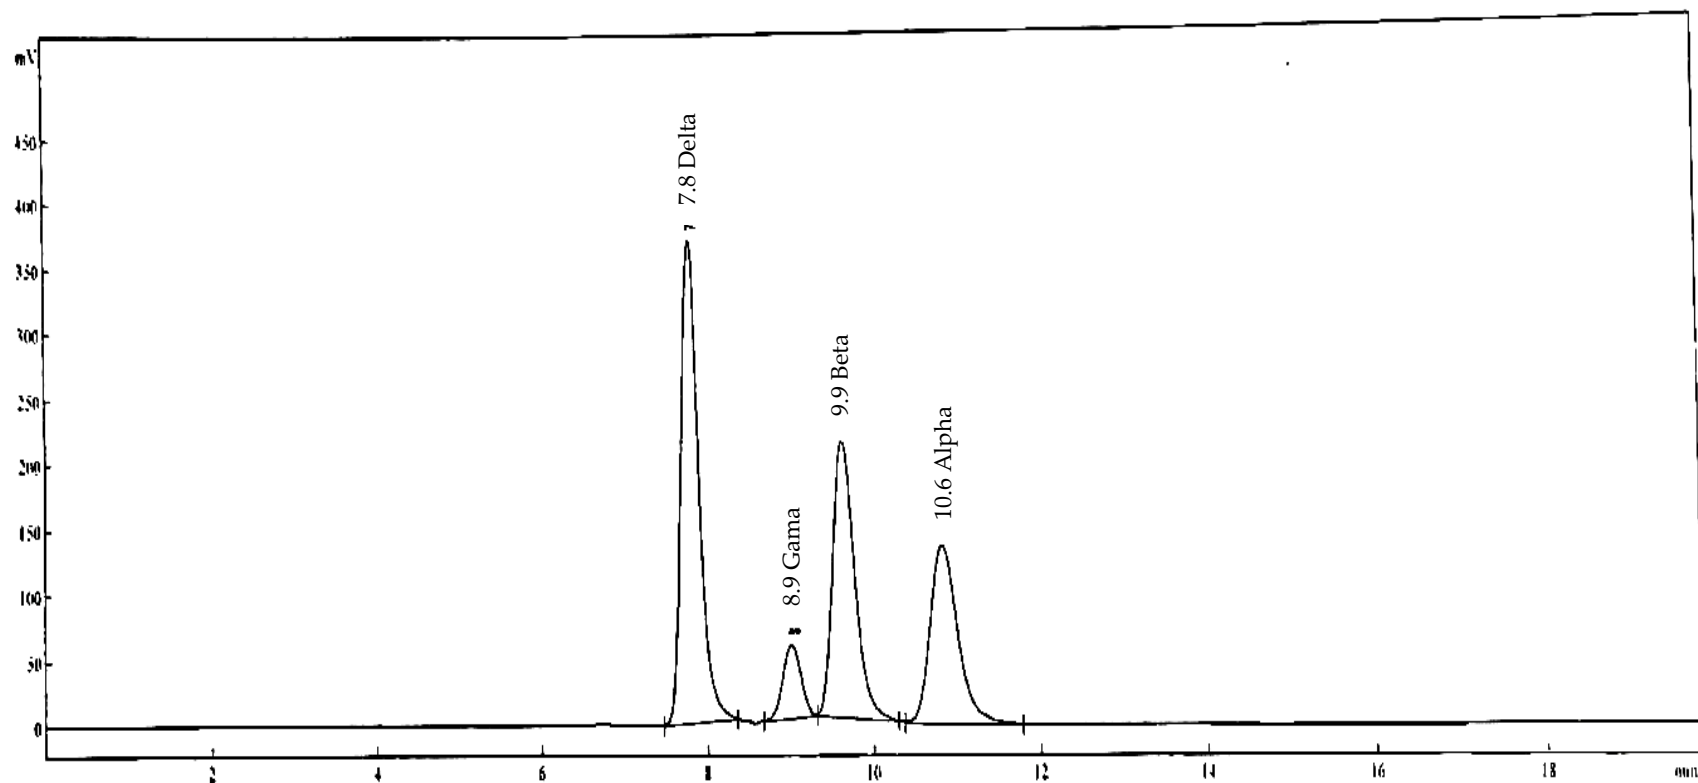

Supplementary Figure S2: HPLC chromatogram for Parent NPJ203

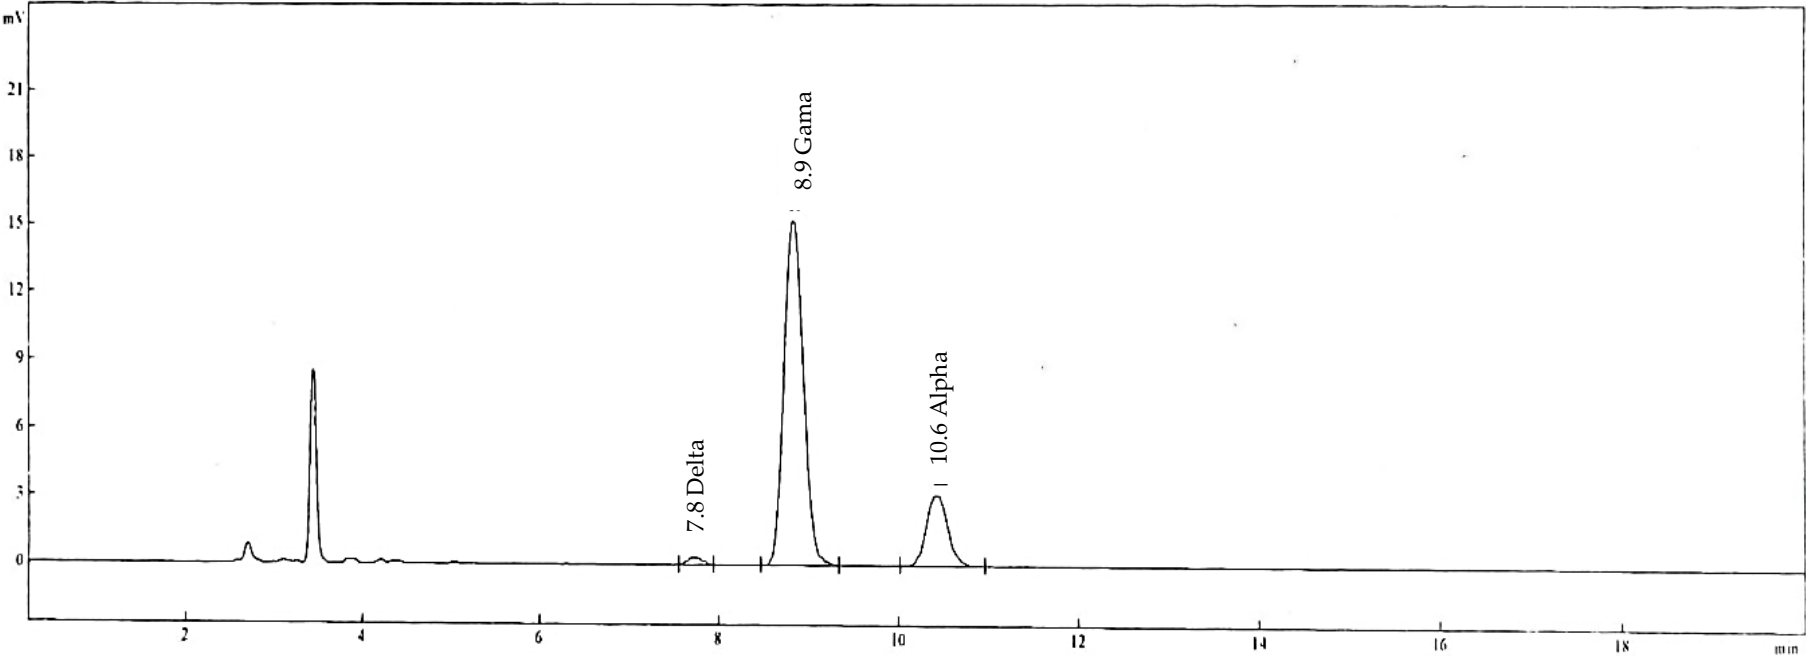

Supplementary Figure S3: HPLC chromatogram for Parent RLC3

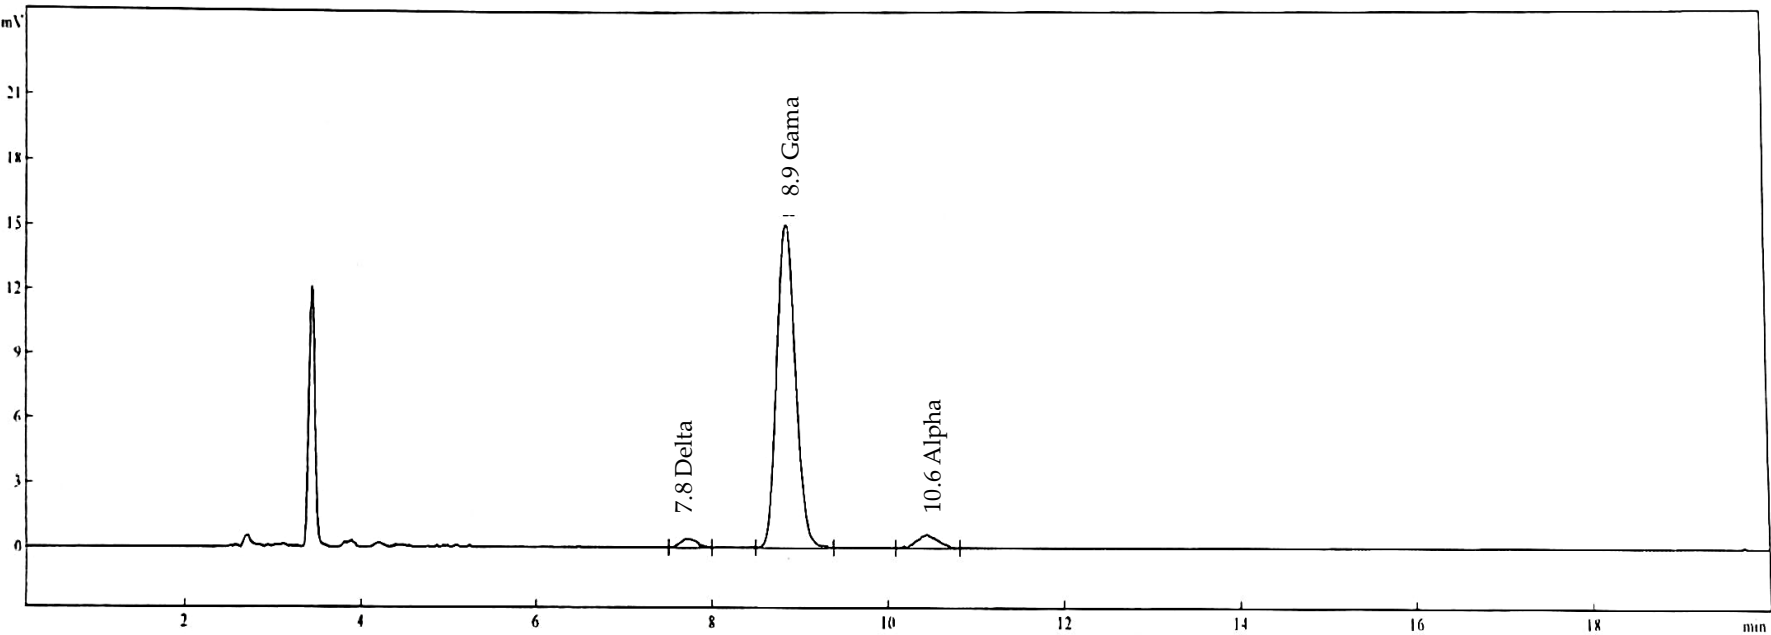

Supplementary Figure S4: HPLC chromatogram for F<sub>1</sub> from cross (RLC3 × NPJ203)

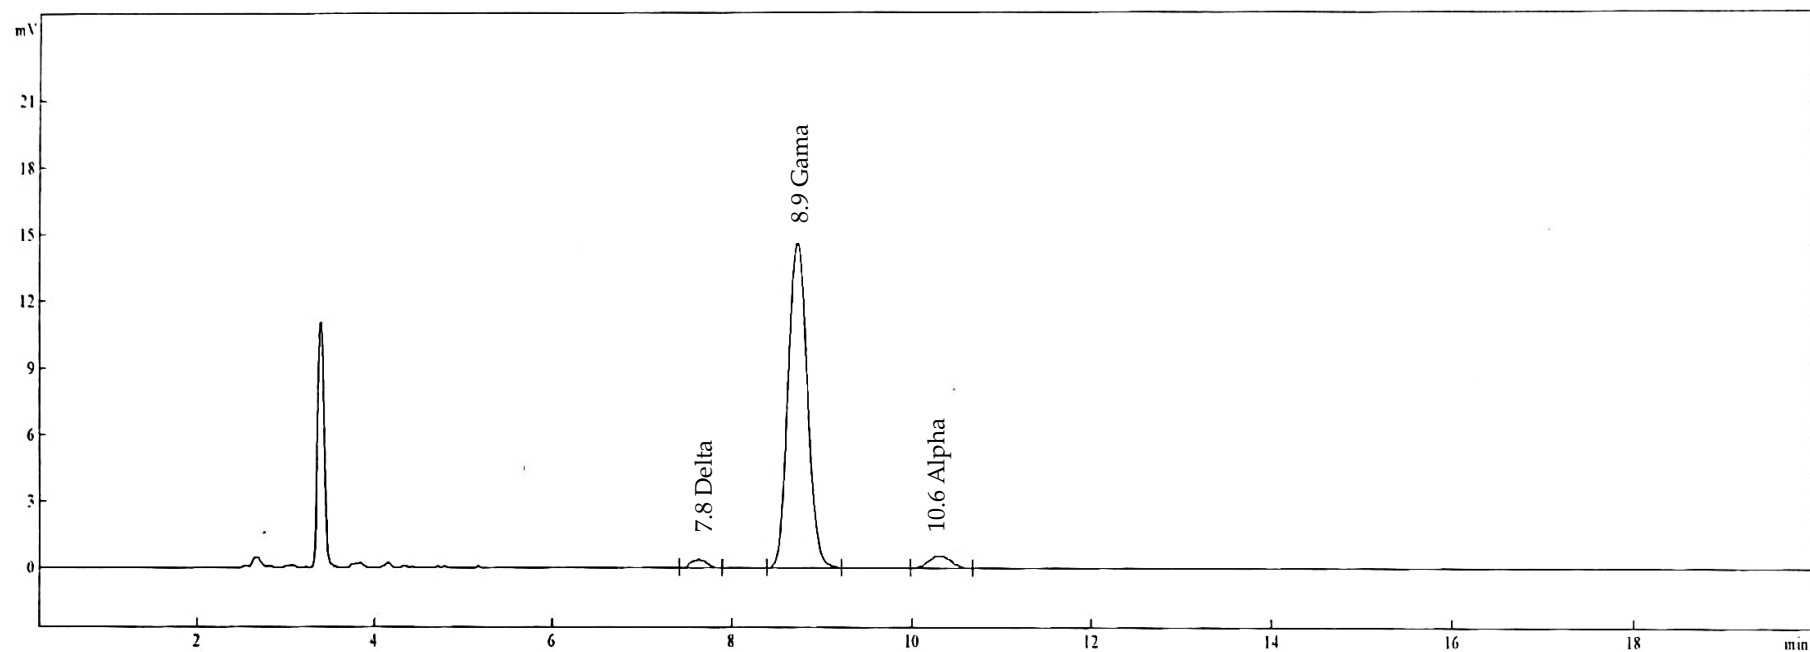

Supplementary Figure S5: HPLC chromatogram for F<sub>1</sub> from cross (NPJ203 × RLC3)

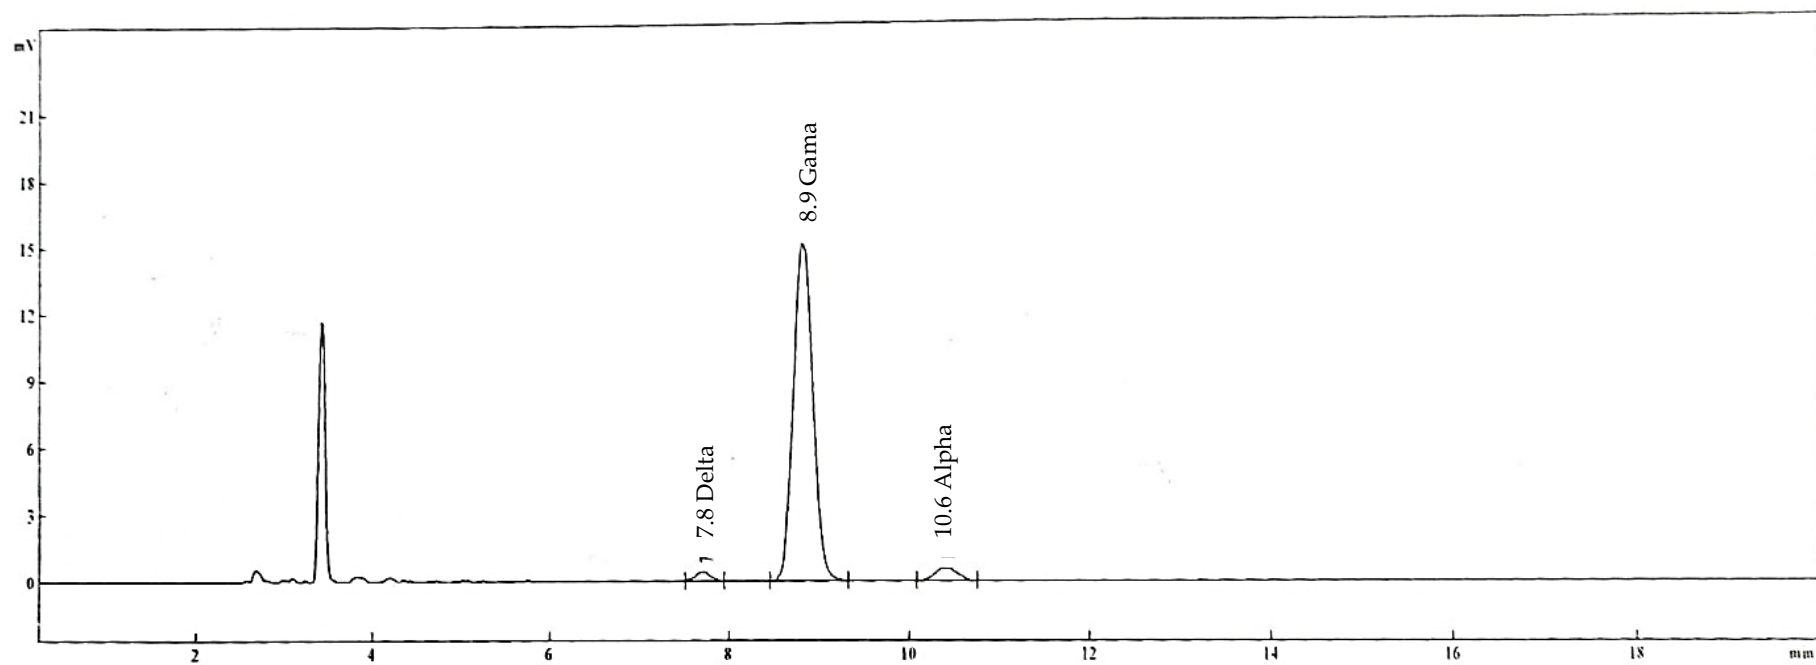

Supplementary Figure S6: HPLC chromatogram for F<sub>2</sub> from cross (RLC3 × NPJ203)

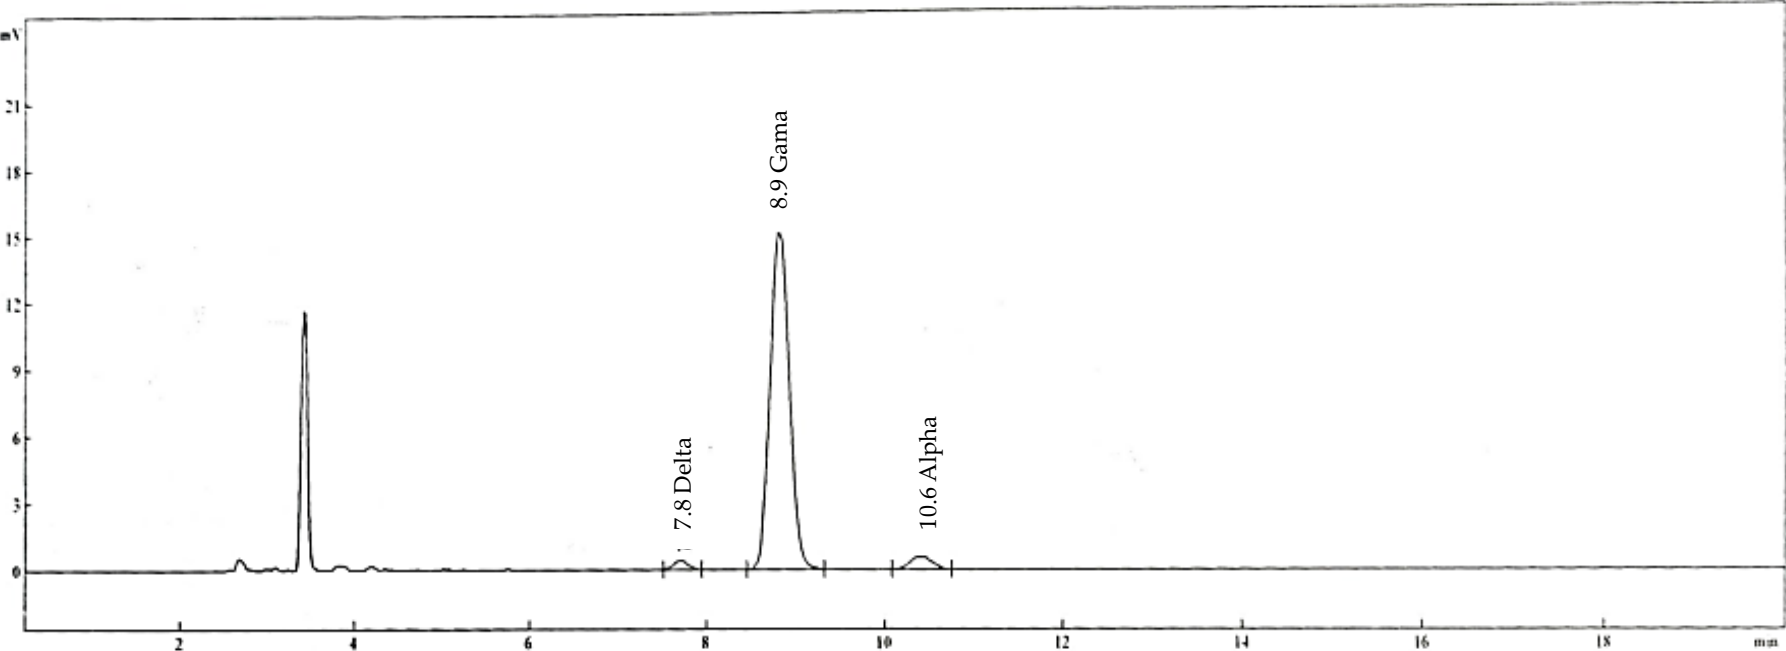

Supplementary Figure S7: HPLC chromatogram for F<sub>2</sub> from cross (NPJ203 × RLC3)

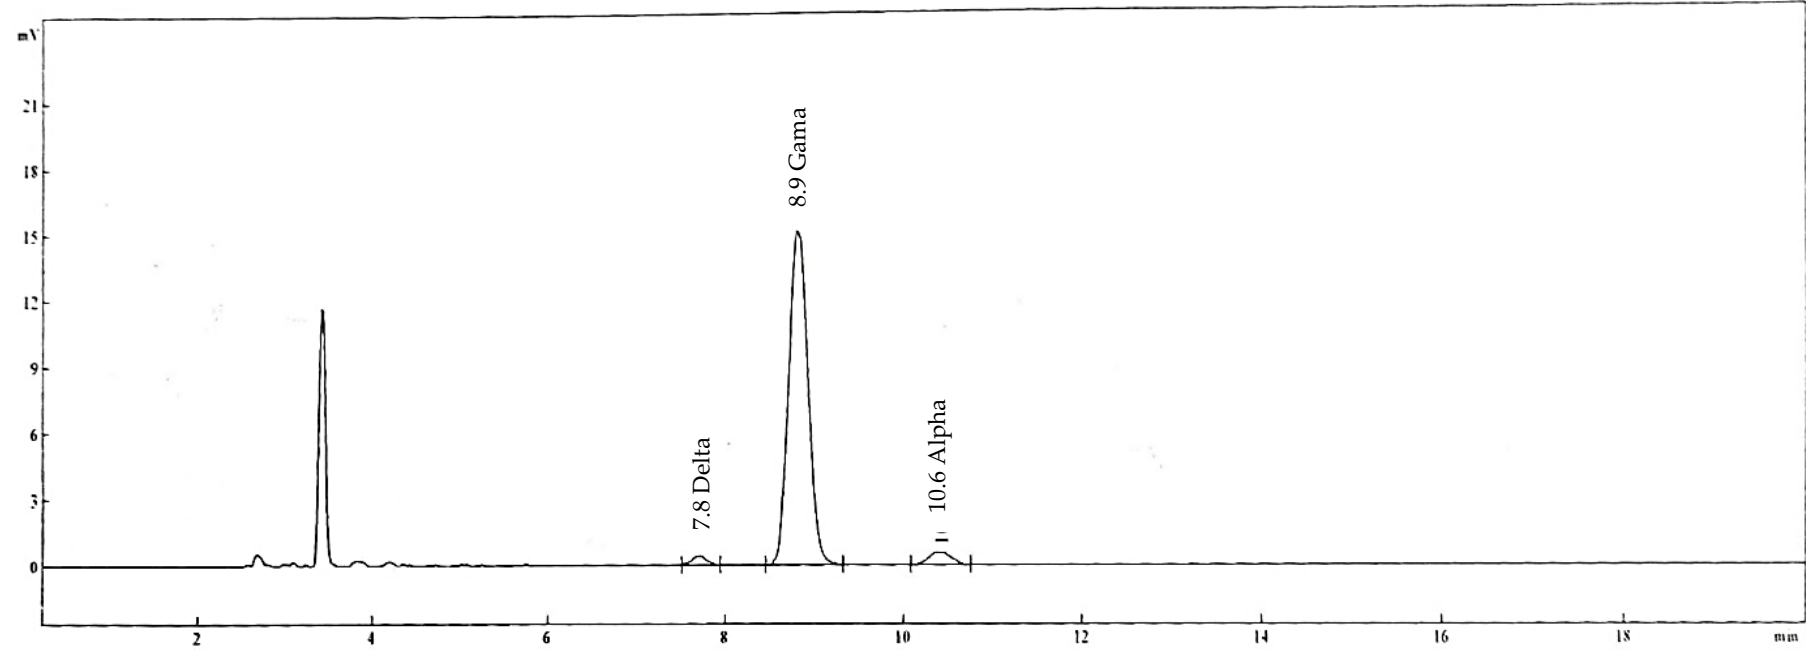

Supplementary Figure S8: HPLC chromatogram for BC1F1 with RLC3 from cross (RLC3 × NPJ203)

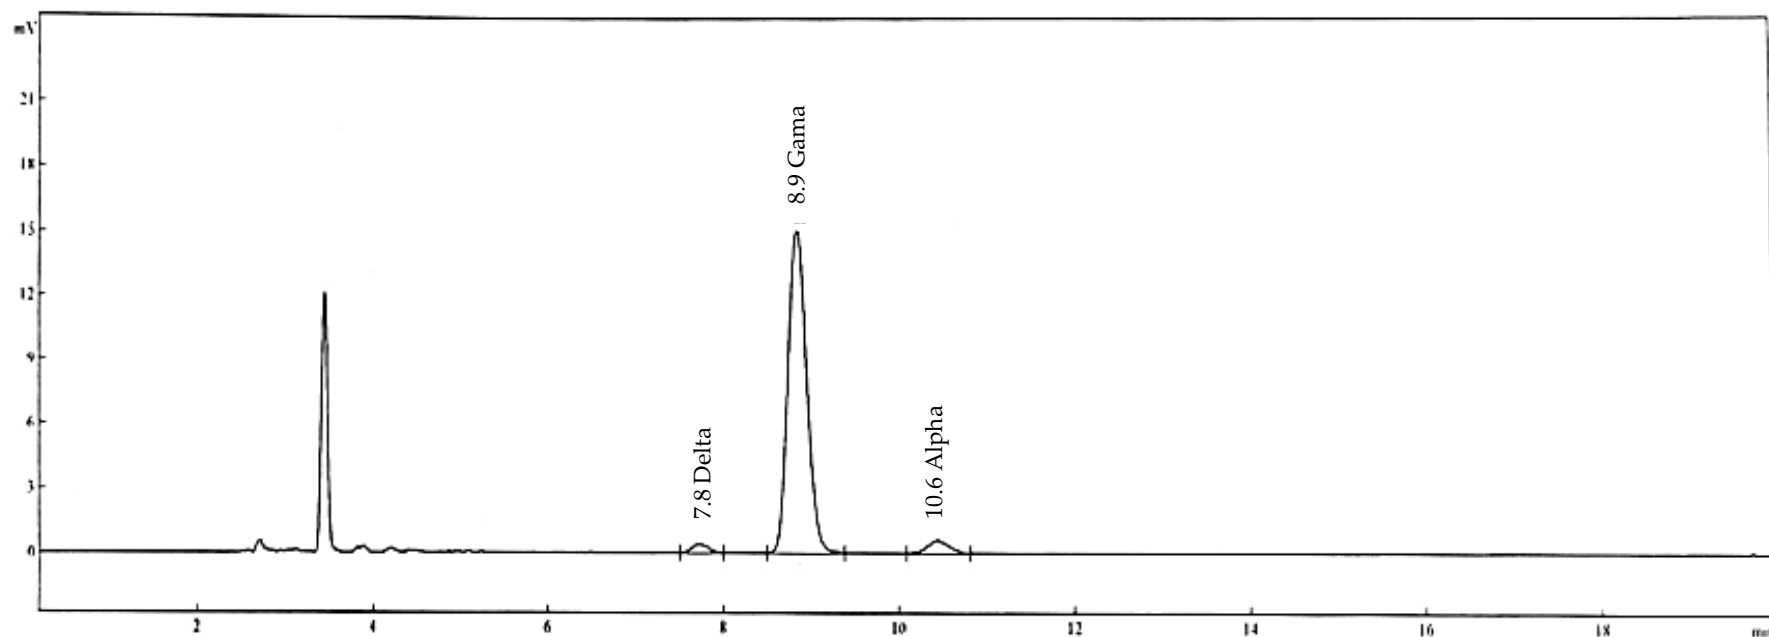



Supplementary Figure S9: HPLC chromatogram for BC1F1 with NPJ203 from cross (RLC3  $\times$  NPJ203)

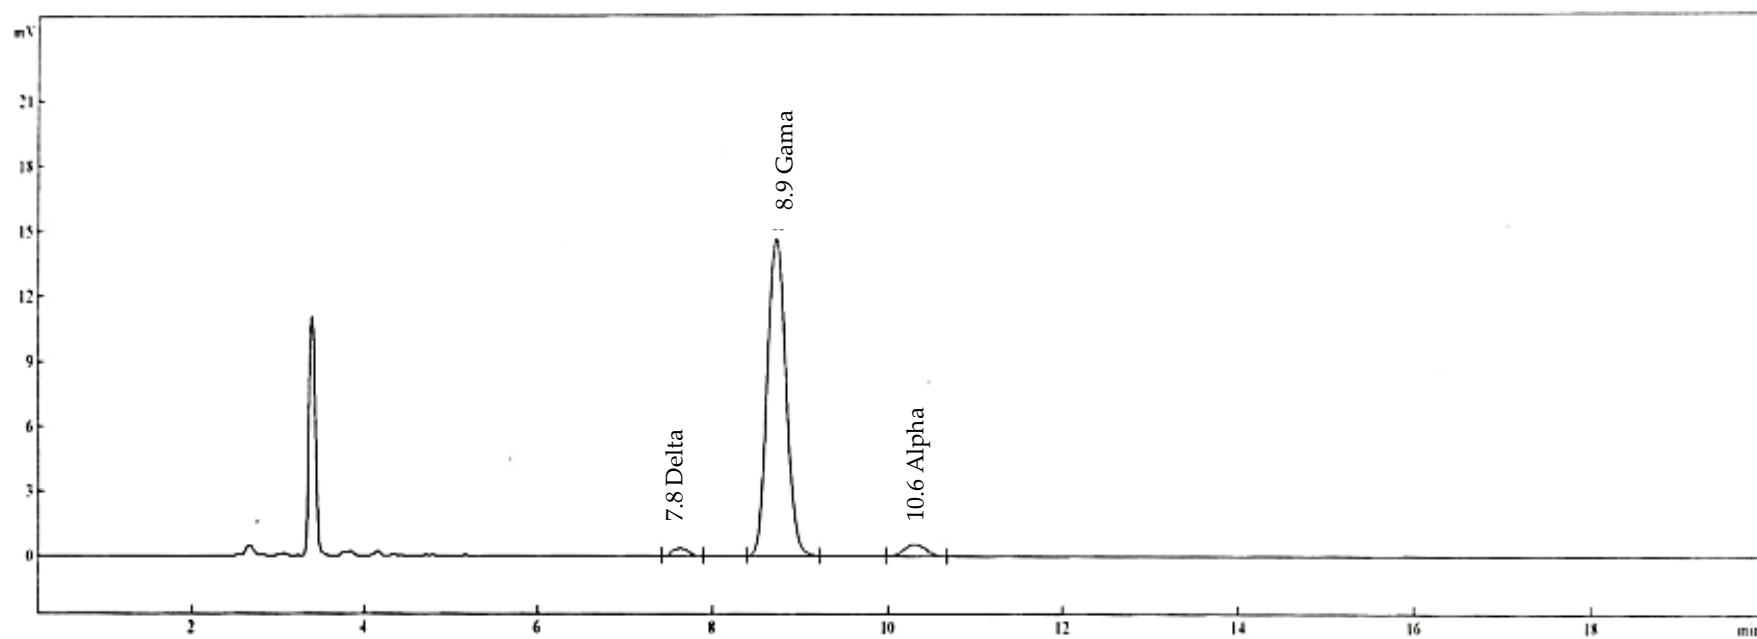

Supplementary Figure S10: HPLC chromatogram for BC1F1 with NPJ203 from cross (NPJ203  $\times$  RLC3)

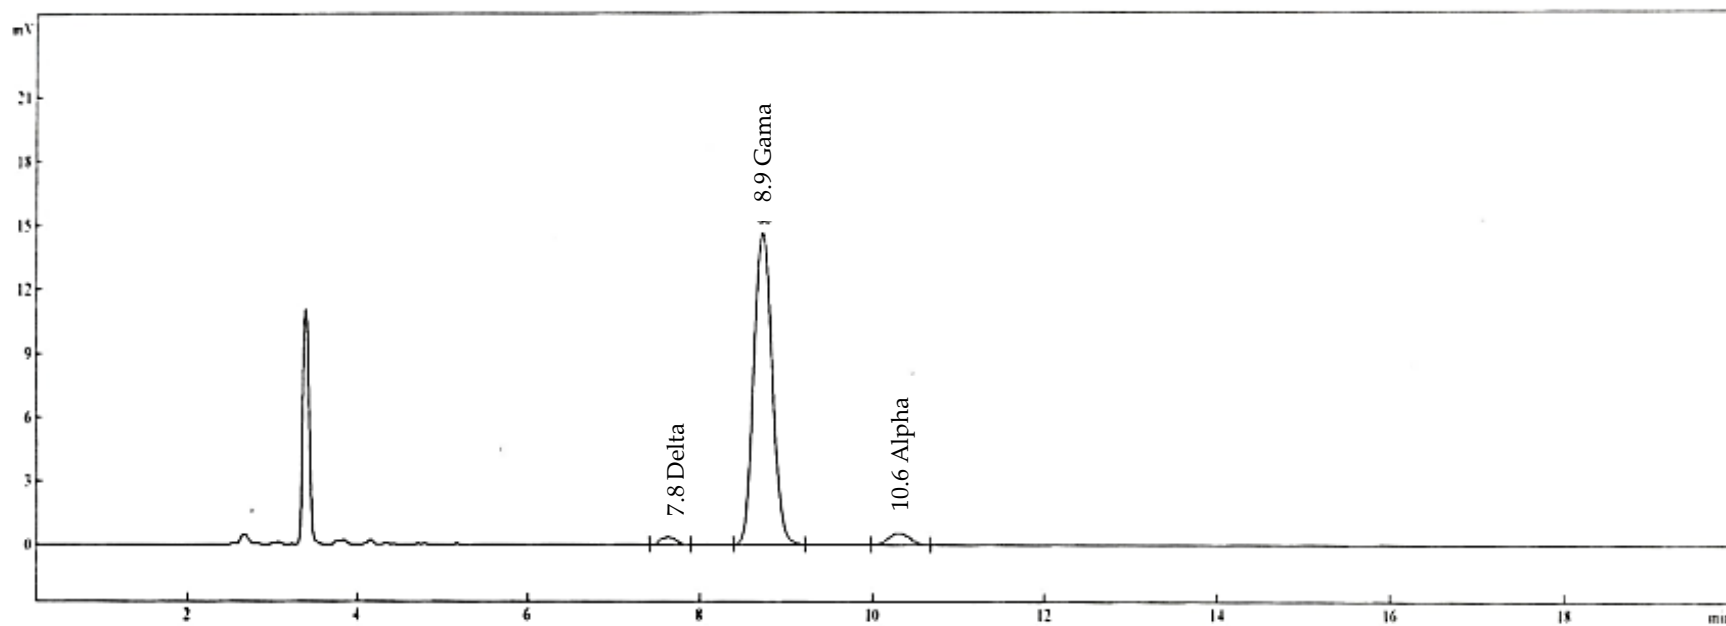

Supplementary Figure S11: HPLC chromatogram for BC1F1 with RLC3 from cross (NPJ203  $\times$  RLC3)

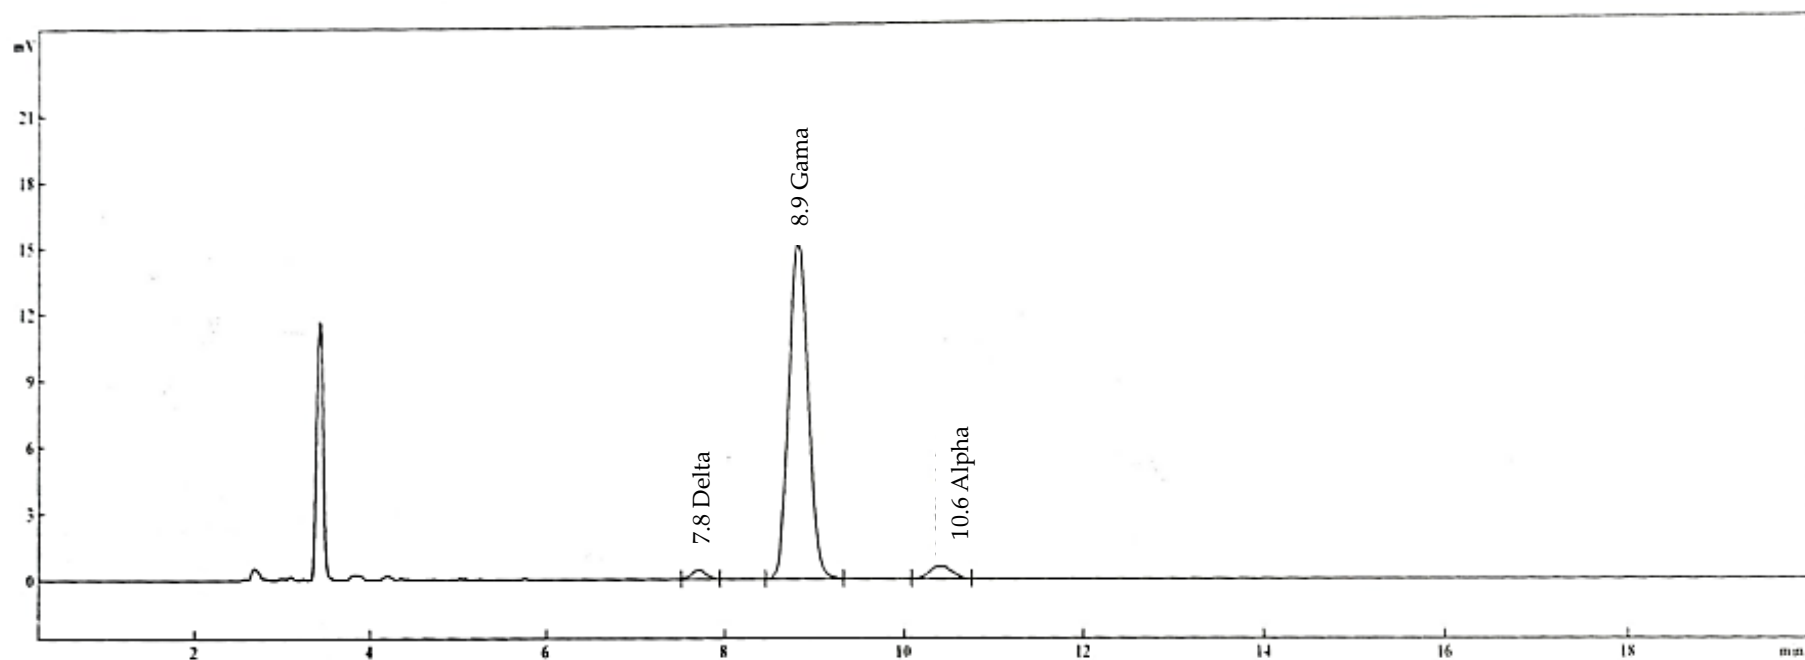

Supplement: s1 [file s1]
