# Supplementary material for: Deciphering the Genetic Inheritance of Tocopherols in Indian Mustard (Brassica juncea L. Czern and Coss)
Source: MDPI journal article supplement (doi:10.3390/plants11131779), 2022-07-05
Supplement: s1 [file s1]

**Supplementary Table S1: Paired *t*-test between different breeding generations for tocopherol content traits**

|             | ATC                  |                 | GTC                  |                 | TTC                  |                 |
|-------------|----------------------|-----------------|----------------------|-----------------|----------------------|-----------------|
|             | <i>p</i> -value      | <i>t</i> -value | <i>p</i> -value      | <i>t</i> -value | <i>p</i> -value      | <i>t</i> -value |
| RLC3_NPJ203 | 0.0002 **            | 72.50           | 0.0453 *             | 4.538           | 0.0104 **            | 9.718           |
| F1D_RLC3    | 0.5318 <sup>ns</sup> | 0.7494          | 0.411 <sup>ns</sup>  | 1.031           | 0.3946 <sup>ns</sup> | 1.076           |
| F1D_NPJ203  | 0.0001 **            | 90.34           | 0.0390 *             | 4.916           | 0.0108 **            | 9.523           |
| F1D_F1R     | 0.4045 <sup>ns</sup> | 1.048           | 0.3889 <sup>ns</sup> | 1.092           | 0.2519 <sup>ns</sup> | 1.594           |
| F2D_F2R     | 0.7216 <sup>ns</sup> | 0.3571          | 0.7573 <sup>ns</sup> | 0.3097          | 0.8901 <sup>ns</sup> | 0.1386          |

\* Significant at 5% level of significance ( $p < 0.05$ ); \*\* highly significant at 1% level of significance ( $p < 0.01$ ); and ns-non significant difference.
